# Supplementary material
Source: Springer Nature journal article supplement (https://www.springermedizin.de/resource/supplementary/12913_2010_1884_MOESM2_ESM.pdf/9529156)

Panel A British Columbia (2000-2005)

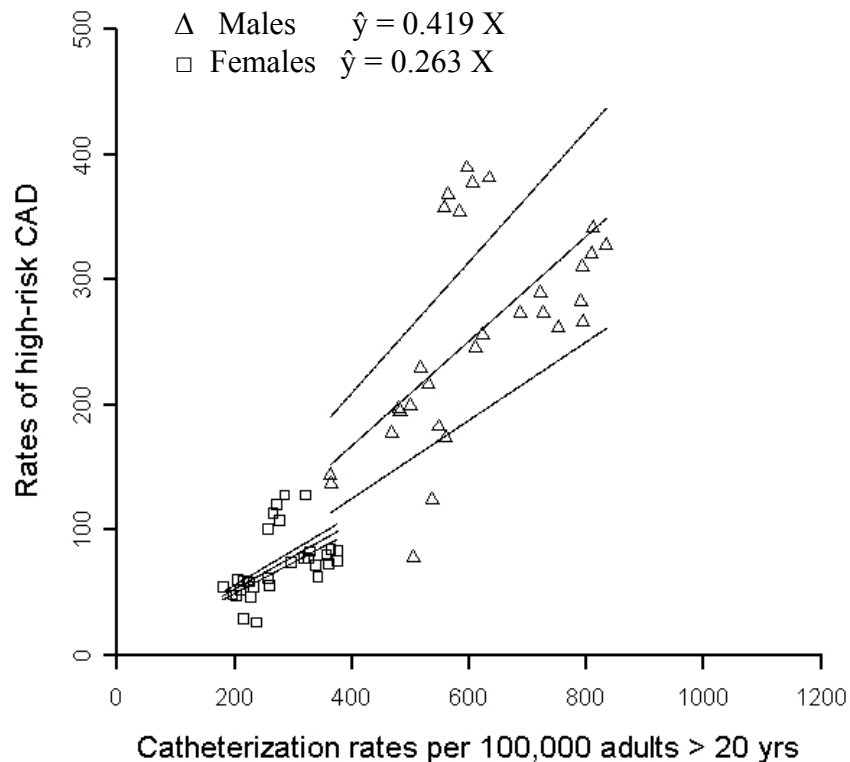

Panel B Nova Scotia (2002-2004)

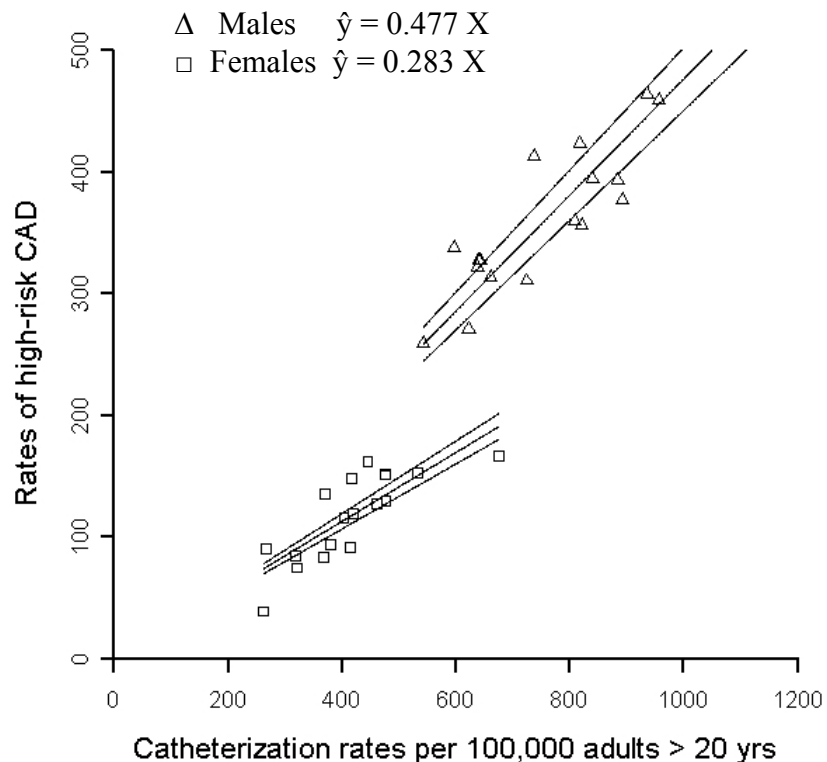

Supplement: MOESM2 [file 9529156]
